# Supplementary material for: A Novel Methylation Marker NRN1 plus TERT and FGFR3 Mutation Using Urine Sediment Enables the Detection of Urothelial Bladder Carcinoma
Source: MDPI journal article supplement (doi:10.3390/cancers15030615), 2023-01-19
Supplement: s1 [file s1]

**Table S3 The adjusted  $p$  value of different SNPs in Hunan multicenter cohort**

| SNP site                              | $p$ value         | Adjust $p$ value  |
|---------------------------------------|-------------------|-------------------|
| <b>TERT.chr5_1295228_1295228_G_A</b>  | <b>2.0609E-12</b> | <b>3.5035E-11</b> |
| <b>FGFR3.chr4_1803568_1803568_C_G</b> | <b>5.139E-08</b>  | <b>8.2224E-07</b> |
| PIK3CA.chr3_178936091_178936091_G_A   | 0.0038193         | 0.05728948        |
| TERT.chr5_1295250_1295250_G_A         | 0.01035685        | 0.14499593        |
| PIK3CA.chr3_178936082_178936082_G_A   | 0.02036447        | 0.26473809        |
| FGFR3.chr4_1806099_1806099_A_G        | 0.04255489        | 0.5106587         |
| PIK3CA.chr3_178952085_178952085_A_G   | 0.25848535        | 1                 |
| FGFR3.chr4_1803564_1803564_C_T        | 0.36408059        | 1                 |
| HRAS.chr11_533874_533874_T_C          | 0.44650398        | 1                 |
| TERT.chr5_1295228_1295228_G_T         | 0.70625115        | 1                 |
| HRAS.chr11_534289_534289_C_T          | 1                 | 1                 |
| FGFR3.chr4_1807890_1807890_A_T        | 1                 | 1                 |
| TP53.chr17_7577099_7577099_C_G        | 1                 | 1                 |
| TP53.chr17_7577570_7577570_C_T        | 1                 | 1                 |
| TP53.chr17_7578389_7578389_G_T        | 1                 | 1                 |
| HRAS.chr11_534286_534286_C_G          | 1                 | 1                 |
| PIK3CA.chr3_178921553_178921553_T_A   | 1                 | 1                 |

Bold SNP sites were selected for model optimization
