# Supplementary material for: A Novel Methylation Marker NRN1 plus TERT and FGFR3 Mutation Using Urine Sediment Enables the Detection of Urothelial Bladder Carcinoma
Source: MDPI journal article supplement (doi:10.3390/cancers15030615), 2023-01-19
Supplement: s1 [file s1]

Table S2 Primers for different methylation region

| Methylation region                  |   | Primer                           |
|-------------------------------------|---|----------------------------------|
| PSMD14_2_chr2_162284029_162284030   | F | TAATTTATTTGTTATAAATATGC          |
|                                     | R | ARCTTAAATATCATTAATAAAAA          |
|                                     | P | TGAGAAGTTTAGAAAATGYAGATTTT       |
| AKAP13_chr15_86233219_86233220      | F | ATTGGATTTTGGGTTTAATGC            |
|                                     | R | AACCAAATAAAATCAAATATTTA          |
|                                     | P | AGYTATTGATTGGYTTTGTGATTTTT       |
| ZNF184_chr6_27463176_27463177       | F | AGYATTAGGGGATATATTTAATGC         |
|                                     | R | CTTTAAATTTTAAAATACATATRCAC       |
|                                     | P | TGATGAGTTAATGGGTGYAGYATATTAATA   |
| cg16966315_chr7_149112317_149112318 | F | TTATATAGATTTTGAGTTTATTGC         |
|                                     | R | TAATAAAAACAAAATTTTCTATATT        |
|                                     | P | CCAARCTAATCTCTAACTCCTAACCTC      |
| NRN1_chr6_6004463_6004464           | F | TTTTAAAATTTAGTGGYGAAAGAAGC       |
|                                     | R | TTACACAGCACACACTCACACATGC        |
|                                     | P | TTTAAATGCATTGATATTTTTTAAGGGGAATT |
| P14ARF_chr9_21968504_21968505       | F | ATTTGGYGGAGGGYAGAGAAAGC          |
|                                     | R | TCACTCCRCACCAAATRCAAAAAAT        |
|                                     | P | TGRAGGGTTGRAAGAAGAAAATGAGTGT     |
| MEIS1_chr2_66667460_66667461        | F | AGATTTGGTTAGATTTTTGC             |
|                                     | R | CCACTTTACATAAAGCACATC            |
|                                     | P | AGCTGCTGAATTTATATGCTTTGT         |
| ACTB                                | F | AGTGAGAAAGGGTGTAGTTTTGGGAG       |
|                                     | R | CCACAAAAAATAACCCAAATAAATAACCCACT |
|                                     | P | CCTCTTCTAATAACCACCTCCCTCCTCCTAAC |
