# Supplementary material for: A Novel Methylation Marker NRN1 plus TERT and FGFR3 Mutation Using Urine Sediment Enables the Detection of Urothelial Bladder Carcinoma
Source: MDPI journal article supplement (doi:10.3390/cancers15030615), 2023-01-19
Supplement: s1 [file s1]

**Table S5. The NGS results and  $\Delta$ ct values of two SNPs in cohort 3**

| Benign control groups | TERT C228T  |                    | FGFR3 p.S249C |                    | UBC tumor groups | TERT C228T  |                    | FGFR3 p.S249C |                    |
|-----------------------|-------------|--------------------|---------------|--------------------|------------------|-------------|--------------------|---------------|--------------------|
|                       | NGS results | $\Delta$ ct values | NGS results   | $\Delta$ ct values |                  | NGS results | $\Delta$ ct values | NGS results   | $\Delta$ ct values |
| DZX00018              | Negative    | 21.83              | Negative      | 20.81              | DZX00063         | Positive    | 9.92               | Negative      | 21.02              |
| DZX00028              | Negative    | 22.57              | Negative      | 19.98              | DZX00124         | Positive    | 12.60              | Negative      | 21.45              |
| DZX00029              | Positive    | 9.75               | Negative      | 17.08              | DZX00002         | Neagtive    | 22.57              | Negative      | 22.37              |
| DZX00032              | Negative    | 22.12              | Negative      | 22.17              | DZX00003         | Positive    | 12.60              | Negative      | 21.57              |
| DZX00035              | Negative    | 25.49              | Negative      | 23.81              | DZX00004         | Positive    | 8.26               | Negative      | 20.18              |
| DZX00036              | Negative    | 22.44              | Negative      | 21.68              | DZX00005         | Positive    | 14.72              | Negative      | 21.66              |
| DZX00037              | Negative    | 21.73              | Positive      | 14.60              | DZX00006         | Positive    | 11.02              | Negative      | 21.31              |
| DZX00040              | Negative    | 21.81              | Negative      | 23.52              | DZX00104         | Positive    | 11.04              | Negative      | 21.38              |
| DZX00062              | Negative    | 18.48              | Negative      | 21.88              | DZX00020         | Positive    | 4.76               | Positive      | 4.80               |
| DZX00075              | Negative    | 22.02              | Negative      | 18.11              | DZX00015         | Positive    | 10.26              | Negative      | 21.02              |
| DZX00083              | Negative    | 21.24              | Negative      | 21.38              | DZX00014         | Positive    | 5.83               | Positive      | 5.20               |
| DZX00084              | Negative    | 22.51              | Negative      | 22.97              | DZX00076         | Positive    | 14.99              | Negative      | 21.67              |
| DZX00087              | Negative    | 22.21              | Negative      | 19.80              | DZX00011         | Positive    | 9.78               | Negative      | 20.80              |
| DZX00089              | Negative    | 22.67              | Negative      | 22.65              | DZX00012         | Positive    | 8.68               | Negative      | 20.19              |
| DZX00091              | Negative    | 21.50              | Negative      | 22.07              | DZX00024         | Positive    | 4.08               | Positive      | 4.27               |
| DZX00093              | Negative    | 22.48              | Negative      | 19.16              | DZX00074         | Positive    | 9.30               | Negative      | 20.58              |
| DZX00096              | Negative    | 21.79              | Negative      | 20.36              | DZX00009         | Positive    | 4.19               | Positive      | 4.42               |
| DZX00097              | Negative    | 25.16              | Negative      | 22.08              | DZX00008         | Positive    | 6.73               | Positive      | 5.86               |
| DZX00098              | Negative    | 16.69              | Negative      | 22.27              | DZX00071         | Positive    | 6.08               | Positive      | 5.42               |
| DZX00102              | Negative    | 18.64              | Negative      | 22.67              | DZX00121         | Positive    | 8.09               | Positive      | 14.91              |
| DZX00117              | Negative    | 22.12              | Negative      | 20.86              | DZX00250         | Neagtive    | 22.00              | Negative      | 22.63              |
| DZX00119              | Negative    | 22.37              | Negative      | 22.17              | DZX00068         | Positive    | 3.65               | Positive      | 17.08              |
| DZX00120              | Negative    | 19.38              | Negative      | 21.55              | DZX00230         | Neagtive    | 21.05              | Positive      | 3.81               |
| DZX00125              | Negative    | 21.05              | Negative      | 23.62              | DZX00105         | Positive    | 9.21               | Negative      | 20.36              |
| DZX00126              | Negative    | 21.31              | Negative      | 22.30              | DZX00110         | Positive    | 8.68               | Negative      | 20.19              |
| DZX00128              | Negative    | 20.58              | Negative      | 22.80              | DZX00131         | Positive    | 14.49              | Negative      | 21.59              |
| DZX00130              | Negative    | 21.78              | Negative      | 21.24              | DZX00111         | Positive    | 11.46              | Negative      | 21.38              |
| DZX00135              | Negative    | 22.62              | Negative      | 20.80              | DZX00132         | Positive    | 11.02              | Negative      | 21.38              |
| DZX00136              | Negative    | 22.00              | Negative      | 21.11              | DZX00113         | Positive    | 8.06               | Positive      | 14.60              |
| DZX00137              | Negative    | 19.20              | Negative      | 22.56              | DZX00114         | Positive    | 12.09              | Negative      | 21.39              |
| DZX00148              | Negative    | 21.95              | Negative      | 21.66              | DZX00080         | Positive    | 11.80              | Negative      | 21.39              |
| DZX00164              | Negative    | 21.21              | Negative      | 23.89              | DZX00118         | Positive    | 4.29               | Positive      | 4.73               |
| DZX00170              | Negative    | 23.74              | Negative      | 21.95              | DZX00214         | Positive    | 4.76               | Positive      | 4.83               |
| DZX00171              | Negative    | 21.53              | Negative      | 22.15              | DZX00249         | Neagtive    | 20.76              | Negative      | 21.99              |
| DZX00185              | Negative    | 22.60              | Negative      | 22.54              | DZX00082         | Positive    | 10.64              | Negative      | 21.25              |
| DZX00187              | Negative    | 21.69              | Negative      | 22.90              | DZX00115         | Positive    | 10.03              | Negative      | 21.02              |
| DZX00195              | Negative    | 21.15              | Negative      | 21.68              | DZX00168         | Positive    | 10.57              | Negative      | 21.11              |
| DZX00198              | Positive    | 9.21               | Negative      | 21.62              | DZX00260         | Neagtive    | 22.43              | Negative      | 22.30              |
| DZX00200              | Negative    | 22.26              | Negative      | 17.77              | DZX00086         | Positive    | 9.25               | Negative      | 20.58              |
| DZX00201              | Positive    | 10.57              | Negative      | 21.98              | DZX00262         | Neagtive    | 21.02              | Positive      | 3.56               |

| Benign<br>control<br>groups | TERT C228T     |                       | FGFR3 p.S249C  |                       | UBC<br>tumor<br>groups | TERT C228T     |                       | FGFR3 p.S249C  |                       |
|-----------------------------|----------------|-----------------------|----------------|-----------------------|------------------------|----------------|-----------------------|----------------|-----------------------|
|                             | NGS<br>results | $\Delta$ ct<br>values | NGS<br>results | $\Delta$ ct<br>values |                        | NGS<br>results | $\Delta$ ct<br>values | NGS<br>results | $\Delta$ ct<br>values |
| DZX00205                    | Negative       | 21.46                 | Negative       | 17.84                 | DZX00090               | Positive       | 11.02                 | Negative       | 21.27                 |
| DZX00217                    | Negative       | 20.76                 | Negative       | 22.96                 | DZX00095               | Positive       | 6.62                  | Positive       | 5.64                  |
| DZX00222                    | Negative       | 21.99                 | Negative       | 19.77                 | DZX00172               | Positive       | 12.09                 | Negative       | 21.42                 |
| DZX00223                    | Negative       | 22.24                 | Negative       | 21.36                 | DZX00177               | Positive       | 8.77                  | Negative       | 20.19                 |
| DZX00224                    | Negative       | 21.67                 | Negative       | 21.13                 | DZX00178               | Positive       | 7.75                  | Positive       | 11.16                 |
| DZX00225                    | Negative       | 23.12                 | Negative       | 20.18                 | DZX00182               | Positive       | 7.75                  | Positive       | 10.11                 |
| DZX00226                    | Negative       | 21.76                 | Negative       | 22.35                 | DZX00184               | Positive       | 10.63                 | Negative       | 21.24                 |
| DZX00228                    | Negative       | 21.02                 | Negative       | 21.98                 | DZX00134               | Positive       | 11.46                 | Negative       | 21.38                 |
| DZX00231                    | Negative       | 21.11                 | Negative       | 22.37                 | DZX00239               | Neagative      | 21.78                 | Positive       | 19.58                 |
| DZX00232                    | Negative       | 21.91                 | Negative       | 21.99                 | DZX00142               | Positive       | 9.86                  | Negative       | 20.81                 |
| DZX00233                    | Negative       | 22.43                 | Negative       | 21.48                 | DZX00144               | Positive       | 12.60                 | Negative       | 21.44                 |
| DZX00234                    | Negative       | 19.81                 | Negative       | 21.57                 | DZX00186               | Positive       | 10.57                 | Negative       | 21.21                 |
| DZX00235                    | Negative       | 22.40                 | Negative       | 22.40                 | DZX00189               | Positive       | 7.28                  | Positive       | 6.76                  |
| DZX00236                    | Negative       | 20.19                 | Negative       | 22.40                 | DZX00145               | Positive       | 10.64                 | Negative       | 21.24                 |
| DZX00237                    | Negative       | 21.49                 | Negative       | 21.59                 | DZX00190               | Positive       | 14.72                 | Negative       | 21.66                 |
| DZX00238                    | Negative       | 22.67                 | Negative       | 22.09                 | DZX00191               | Positive       | 9.20                  | Negative       | 20.19                 |
| DZX00240                    | Negative       | 21.38                 | Negative       | 21.86                 | DZX00147               | Positive       | 17.87                 | Negative       | 21.69                 |
| DZX00241                    | Negative       | 21.84                 | Negative       | 21.27                 | DZX00149               | Positive       | 14.49                 | Negative       | 21.57                 |
| DZX00272                    | Negative       | 23.65                 | Negative       | 21.39                 | DZX00100               | Neagative      | 18.65                 | Negative       | 21.78                 |
| DZX00277                    | Negative       | 22.09                 | Negative       | 20.60                 | DZX00169               | Positive       | 9.20                  | Negative       | 20.36                 |
| DZX00292                    | Negative       | 21.74                 | Negative       | 21.80                 | DZX00216               | Positive       | 10.57                 | Negative       | 21.15                 |
| DZX00297                    | Negative       | 21.82                 | Negative       | 21.72                 | DZX00220               | Neagative      | 21.81                 | Positive       | 19.99                 |
| DZX00300                    | Negative       | 21.65                 | Negative       | 19.30                 | DZX00246               | Neagative      | 19.20                 | Negative       | 21.84                 |
| DZX00303                    | Negative       | 18.04                 | Negative       | 22.50                 | DZX00153               | Positive       | 8.06                  | Positive       | 14.60                 |
| DZX00311                    | Negative       | 22.16                 | Negative       | 22.21                 | DZX00227               | Neagative      | 18.64                 | Negative       | 21.80                 |
| DZX00315                    | Negative       | 22.06                 | Negative       | 22.60                 | DZX00157               | Neagative      | 18.61                 | Negative       | 21.72                 |
| DZX00322                    | Negative       | 22.40                 | Negative       | 20.71                 | DZX00158               | Positive       | 10.26                 | Negative       | 21.02                 |
| DZX00324                    | Negative       | 22.28                 | Negative       | 21.50                 | DZX00160               | Positive       | 14.49                 | Negative       | 21.63                 |
| DZX00326                    | Negative       | 19.99                 | Negative       | 20.42                 | DZX00116               | Positive       | 7.30                  | Positive       | 8.12                  |
| DZX00346                    | Negative       | 22.52                 | Negative       | 21.98                 | DZX00192               | Positive       | 7.74                  | Positive       | 10.08                 |
| DZX00347                    | Negative       | 20.20                 | Negative       | 22.28                 | DZX00194               | Positive       | 7.76                  | Positive       | 12.85                 |
| DZX00355                    | Negative       | 21.35                 | Negative       | 22.50                 | DZX00206               | Positive       | 17.87                 | Negative       | 21.68                 |
| DZX00356                    | Negative       | 21.75                 | Negative       | 22.57                 | DZX00207               | Positive       | 10.57                 | Negative       | 21.15                 |
| DZX00360                    | Negative       | 22.21                 | Negative       | 21.39                 | DZX00210               | Positive       | 7.28                  | Positive       | 6.68                  |
| DZX00361                    | Negative       | 21.85                 | Negative       | 21.57                 | DZX00211               | Positive       | 11.02                 | Negative       | 21.38                 |
| DZX00378                    | Negative       | 22.14                 | Negative       | 21.79                 | DZX00229               | Neagative      | 21.69                 | Positive       | 18.11                 |
| DZX00406                    | Negative       | 19.26                 | Negative       | 22.27                 | DZX00247               | Neagative      | 19.99                 | Negative       | 21.91                 |
| DZX00407                    | Negative       | 22.44                 | Negative       | 22.02                 | DZX00255               | Neagative      | 21.31                 | Negative       | 22.24                 |
| DZX00415                    | Negative       | 21.73                 | Negative       | 22.42                 | DZX00256               | Positive       | 7.28                  | Positive       | 6.87                  |
| DZX00473                    | Negative       | 25.49                 | Negative       | 21.57                 | DZX00252               | Neagative      | 23.65                 | Negative       | 22.50                 |
| DZX00488                    | Negative       | 25.16                 | Negative       | 21.96                 | DZX00257               | Neagative      | 21.21                 | Negative       | 22.08                 |

| Benign<br>control<br>groups | TERT C228T     |                       | FGFR3 p.S249C  |                       | UBC<br>tumor<br>groups | TERT C228T     |                       | FGFR3 p.S249C  |                       |
|-----------------------------|----------------|-----------------------|----------------|-----------------------|------------------------|----------------|-----------------------|----------------|-----------------------|
|                             | NGS<br>results | $\Delta$ ct<br>values | NGS<br>results | $\Delta$ ct<br>values |                        | NGS<br>results | $\Delta$ ct<br>values | NGS<br>results | $\Delta$ ct<br>values |
| DZX00498                    | Positive       | 9.92                  | Negative       | 17.68                 | DZX00258               | Neagtive       | 20.58                 | Negative       | 21.96                 |
| DZX00587                    | Positive       | 14.72                 | Negative       | 21.63                 | DZX00261               | Neagtive       | 22.62                 | Negative       | 22.43                 |
| DZX00613                    | Positive       | 11.02                 | Positive       | 3.81                  | DZX00263               | Neagtive       | 21.91                 | Negative       | 22.62                 |
|                             |                |                       |                |                       | DZX00483               | Positive       | 9.75                  | Negative       | 20.58                 |
|                             |                |                       |                |                       | DZX00389               | Positive       | 18.48                 | Negative       | 21.70                 |
|                             |                |                       |                |                       | DZX00417               | Neagtive       | 18.64                 | Negative       | 21.36                 |
|                             |                |                       |                |                       | DZX00338               | Neagtive       | 18.96                 | Negative       | 21.84                 |
|                             |                |                       |                |                       | DZX00358               | Neagtive       | 19.20                 | Negative       | 21.65                 |
|                             |                |                       |                |                       | DZX00461               | Neagtive       | 19.56                 | Negative       | 21.86                 |
|                             |                |                       |                |                       | DZX00276               | Neagtive       | 19.26                 | Negative       | 21.88                 |
|                             |                |                       |                |                       | DZX00451               | Neagtive       | 19.38                 | Negative       | 21.91                 |
|                             |                |                       |                |                       | DZX00316               | Neagtive       | 19.99                 | Negative       | 21.14                 |
|                             |                |                       |                |                       | DZX00321               | Neagtive       | 16.83                 | Negative       | 21.48                 |
|                             |                |                       |                |                       | DZX00298               | Neagtive       | 20.19                 | Negative       | 21.87                 |
|                             |                |                       |                |                       | DZX00329               | Neagtive       | 20.45                 | Negative       | 21.43                 |
|                             |                |                       |                |                       | DZX00266               | Neagtive       | 20.58                 | Negative       | 21.19                 |
|                             |                |                       |                |                       | DZX00486               | Neagtive       | 20.73                 | Negative       | 21.82                 |
|                             |                |                       |                |                       | DZX00337               | Neagtive       | 20.59                 | Negative       | 21.99                 |
|                             |                |                       |                |                       | DZX00305               | Neagtive       | 21.76                 | Positive       | 1.89                  |
|                             |                |                       |                |                       | DZX00376               | Neagtive       | 21.02                 | Positive       | 3.81                  |
|                             |                |                       |                |                       | DZX00364               | Neagtive       | 21.05                 | Positive       | 4.04                  |
|                             |                |                       |                |                       | DZX00310               | Neagtive       | 21.34                 | Negative       | 22.07                 |
|                             |                |                       |                |                       | DZX00363               | Neagtive       | 21.11                 | Negative       | 22.08                 |
|                             |                |                       |                |                       | DZX00340               | Neagtive       | 21.21                 | Negative       | 22.09                 |
|                             |                |                       |                |                       | DZX00289               | Neagtive       | 21.78                 | Negative       | 22.03                 |
|                             |                |                       |                |                       | DZX00431               | Neagtive       | 21.24                 | Negative       | 22.15                 |
|                             |                |                       |                |                       | DZX00445               | Neagtive       | 21.31                 | Negative       | 22.27                 |
|                             |                |                       |                |                       | DZX00372               | Neagtive       | 21.93                 | Negative       | 22.65                 |
|                             |                |                       |                |                       | DZX00330               | Neagtive       | 21.38                 | Positive       | 17.08                 |
|                             |                |                       |                |                       | DZX00280               | Neagtive       | 22.73                 | Positive       | 17.68                 |
|                             |                |                       |                |                       | DZX00470               | Neagtive       | 21.46                 | Positive       | 17.75                 |
|                             |                |                       |                |                       | DZX00281               | Neagtive       | 21.59                 | Positive       | 17.84                 |
|                             |                |                       |                |                       | DZX00409               | Neagtive       | 21.50                 | Positive       | 18.04                 |
|                             |                |                       |                |                       | DZX00269               | Neagtive       | 21.53                 | Positive       | 18.42                 |
|                             |                |                       |                |                       | DZX00440               | Neagtive       | 21.65                 | Positive       | 18.36                 |
|                             |                |                       |                |                       | DZX00436               | Neagtive       | 23.69                 | Positive       | 18.62                 |
|                             |                |                       |                |                       | DZX00374               | Neagtive       | 21.86                 | Positive       | 18.64                 |
|                             |                |                       |                |                       | DZX00388               | Neagtive       | 21.73                 | Positive       | 18.50                 |
|                             |                |                       |                |                       | DZX00270               | Neagtive       | 21.12                 | Positive       | 19.20                 |
|                             |                |                       |                |                       | DZX00283               | Neagtive       | 21.78                 | Positive       | 19.71                 |
|                             |                |                       |                |                       | DZX00457               | Neagtive       | 21.81                 | Positive       | 19.77                 |

| Benign<br>control<br>groups | TERT C228T     |                       | FGFR3 p.S249C  |                       | UBC<br>tumor<br>groups | TERT C228T     |                       | FGFR3 p.S249C  |                       |
|-----------------------------|----------------|-----------------------|----------------|-----------------------|------------------------|----------------|-----------------------|----------------|-----------------------|
|                             | NGS<br>results | $\Delta$ ct<br>values | NGS<br>results | $\Delta$ ct<br>values |                        | NGS<br>results | $\Delta$ ct<br>values | NGS<br>results | $\Delta$ ct<br>values |
|                             |                |                       |                |                       | DZX00448               | Neagative      | 21.79                 | Positive       | 19.64                 |
|                             |                |                       |                |                       | DZX00275               | Neagative      | 21.83                 | Positive       | 20.18                 |
|                             |                |                       |                |                       | DZX00282               | Neagative      | 21.47                 | Negative       | 22.57                 |
|                             |                |                       |                |                       | DZX00480               | Neagative      | 21.98                 | Negative       | 22.72                 |
|                             |                |                       |                |                       | DZX00371               | Neagative      | 21.84                 | Negative       | 21.43                 |
|                             |                |                       |                |                       | DZX00304               | Neagative      | 20.37                 | Negative       | 22.62                 |
|                             |                |                       |                |                       | DZX00362               | Neagative      | 21.91                 | Negative       | 23.66                 |
|                             |                |                       |                |                       | DZX00312               | Neagative      | 21.99                 | Negative       | 22.46                 |
|                             |                |                       |                |                       | DZX00397               | Neagative      | 21.76                 | Negative       | 20.74                 |
|                             |                |                       |                |                       | DZX00265               | Neagative      | 22.02                 | Negative       | 23.52                 |
|                             |                |                       |                |                       | DZX00366               | Neagative      | 22.12                 | Negative       | 23.62                 |
|                             |                |                       |                |                       | DZX00375               | Neagative      | 22.18                 | Negative       | 23.81                 |
|                             |                |                       |                |                       | DZX00325               | Neagative      | 22.21                 | Negative       | 23.06                 |
|                             |                |                       |                |                       | DZX00405               | Neagative      | 22.26                 | Negative       | 23.89                 |
|                             |                |                       |                |                       | DZX00313               | Neagative      | 22.58                 | Negative       | 22.28                 |
|                             |                |                       |                |                       | DZX00335               | Neagative      | 22.37                 | Negative       | 22.34                 |
|                             |                |                       |                |                       | DZX00438               | Neagative      | 22.43                 | Negative       | 22.30                 |
|                             |                |                       |                |                       | DZX00264               | Neagative      | 22.44                 | Negative       | 22.35                 |
|                             |                |                       |                |                       | DZX00420               | Neagative      | 22.29                 | Negative       | 22.54                 |
|                             |                |                       |                |                       | DZX00336               | Neagative      | 22.57                 | Negative       | 22.40                 |
|                             |                |                       |                |                       | DZX00413               | Neagative      | 22.67                 | Negative       | 22.55                 |
|                             |                |                       |                |                       | DZX00317               | Neagative      | 22.60                 | Negative       | 22.42                 |
|                             |                |                       |                |                       | DZX00285               | Neagative      | 22.71                 | Negative       | 22.29                 |
|                             |                |                       |                |                       | DZX00395               | Neagative      | 22.62                 | Negative       | 22.43                 |
|                             |                |                       |                |                       | DZX00352               | Neagative      | 22.67                 | Negative       | 22.14                 |
|                             |                |                       |                |                       | DZX00459               | Neagative      | 23.20                 | Negative       | 22.34                 |
|                             |                |                       |                |                       | DZX00279               | Neagative      | 23.65                 | Negative       | 22.50                 |
|                             |                |                       |                |                       | DZX00379               | Neagative      | 24.67                 | Negative       | 22.56                 |
|                             |                |                       |                |                       | DZX00290               | Neagative      | 23.09                 | Negative       | 21.88                 |
|                             |                |                       |                |                       | DZX00373               | Neagative      | 25.16                 | Negative       | 21.76                 |
|                             |                |                       |                |                       | DZX00369               | Neagative      | 25.18                 | Negative       | 22.06                 |
|                             |                |                       |                |                       | DZX00447               | Neagative      | 25.49                 | Negative       | 19.60                 |
|                             |                |                       |                |                       | DZX00348               | Neagative      | 25.92                 | Negative       | 21.05                 |
|                             |                |                       |                |                       | DZX00410               | Neagative      | 25.90                 | Negative       | 23.98                 |
