# Supplementary material for: A Novel Methylation Marker NRN1 plus TERT and FGFR3 Mutation Using Urine Sediment Enables the Detection of Urothelial Bladder Carcinoma
Source: MDPI journal article supplement (doi:10.3390/cancers15030615), 2023-01-19
Supplement: s1 [file s1]

Table S1. Clinical and pathological data of the cohort 1 and cohort 2

|                          | Cohort 1   |            | Cohort 2   |            |
|--------------------------|------------|------------|------------|------------|
|                          | UBC        | Control    | UBC        | Control    |
| Sample Size              | 33         | 19         | 38         | 31         |
| Age, Years, Median (IQR) | 63 (51-75) | 61 (53-70) | 59 (50-68) | 57 (48-73) |
| Gender                   |            |            |            |            |
| Male                     | 23         | 14         | 27         | 25         |
| Female                   | 10         | 5          | 11         | 6          |
| Smoking History          |            |            |            |            |
| Smoker                   | 20         | 11         | 22         | 27         |
| Non smokers              | 13         | 8          | 16         | 4          |
| Stage                    |            |            |            |            |
| Ta                       | 8          | /          | 10         | /          |
| T1                       | 5          |            | 5          |            |
| T2                       | 12         | /          | 10         | /          |
| T3                       | 5          |            | 10         |            |
| T4                       | 3          |            | 3          |            |
| Grade                    |            |            |            |            |
| Low grade                | 9          | /          | 14         | /          |
| High grade               | 24         | /          | 24         | /          |
| Control Group            | /          |            | /          |            |
| Urolithiasis             | /          | 15         | /          | 26         |
| Infection                | /          | 4          | /          | 5          |
