# Supplementary material for: A Novel Methylation Marker NRN1 plus TERT and FGFR3 Mutation Using Urine Sediment Enables the Detection of Urothelial Bladder Carcinoma
Source: MDPI journal article supplement (doi:10.3390/cancers15030615), 2023-01-19
Supplement: s1 [file s1]

Table S4 Primers for different SNP sites

| SNP site      |   | Seq 5'→3' (5'FAM,3'MGB)    |
|---------------|---|----------------------------|
| TERT C228T    | F | GAGGGGGTTGGGTCGGGGATTTCGGA |
|               | R | CCGAACACCCGTCCTACCCCTTCA   |
|               | P | TCGGGACGGGGCGGGGTTTCGCG    |
| FGFR3 p.S249C | F | GTGGCGGTGACCAAGTTGGG       |
|               | R | AGAGAGCAGAGCGATAGGCG       |
|               | P | TGGCTGAGGAGTTGGTGGTGGCG    |
| GAPDH         | F | CATCTTCTTTTGCGTGCCAG       |
|               | R | GGAGAGAACAGTGAGCGCCT       |
|               | P | CGGGAGGCTAGGGACGGCCTGAAGGC |
